# Supplementary material for: Consideration of various aspects in a drift study of MH370 debris
Source: Copernicus journal article supplement (doi:10.5194/os-14-387-2018), 2018-06-04
Supplement: Supplementary file 1 [file os-14-387-2018-supplement.zip]

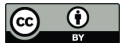

## *Supplement of*

# **Consideration of various aspects in a drift study of MH370 debris**

**Oleksandr Nesterov**

*Correspondence to:* Oleksandr Nesterov (oleksandr.nesterov@gmail.com)

- os-14-387-2018-supplement-title-page.pdf
- S1.mp4
- S2a(50,000particles).mp4
- S2b(500,000particles).mp4
- S3.mp4
- S4.mp4
- S5.jpg
- S5.mp4

The copyright of individual parts of the supplement might differ from the CC BY 4.0 License.
